# Supplementary material
Source: Springer Nature journal article supplement (https://www.springermedizin.de/resource/supplementary/13023_2008_136_MOESM3_ESM.pdf/9641750)

**Ventriculo-infundibular fold**

**Septo-parietal  
trabeculations**

**Septomarginal trabeculation**

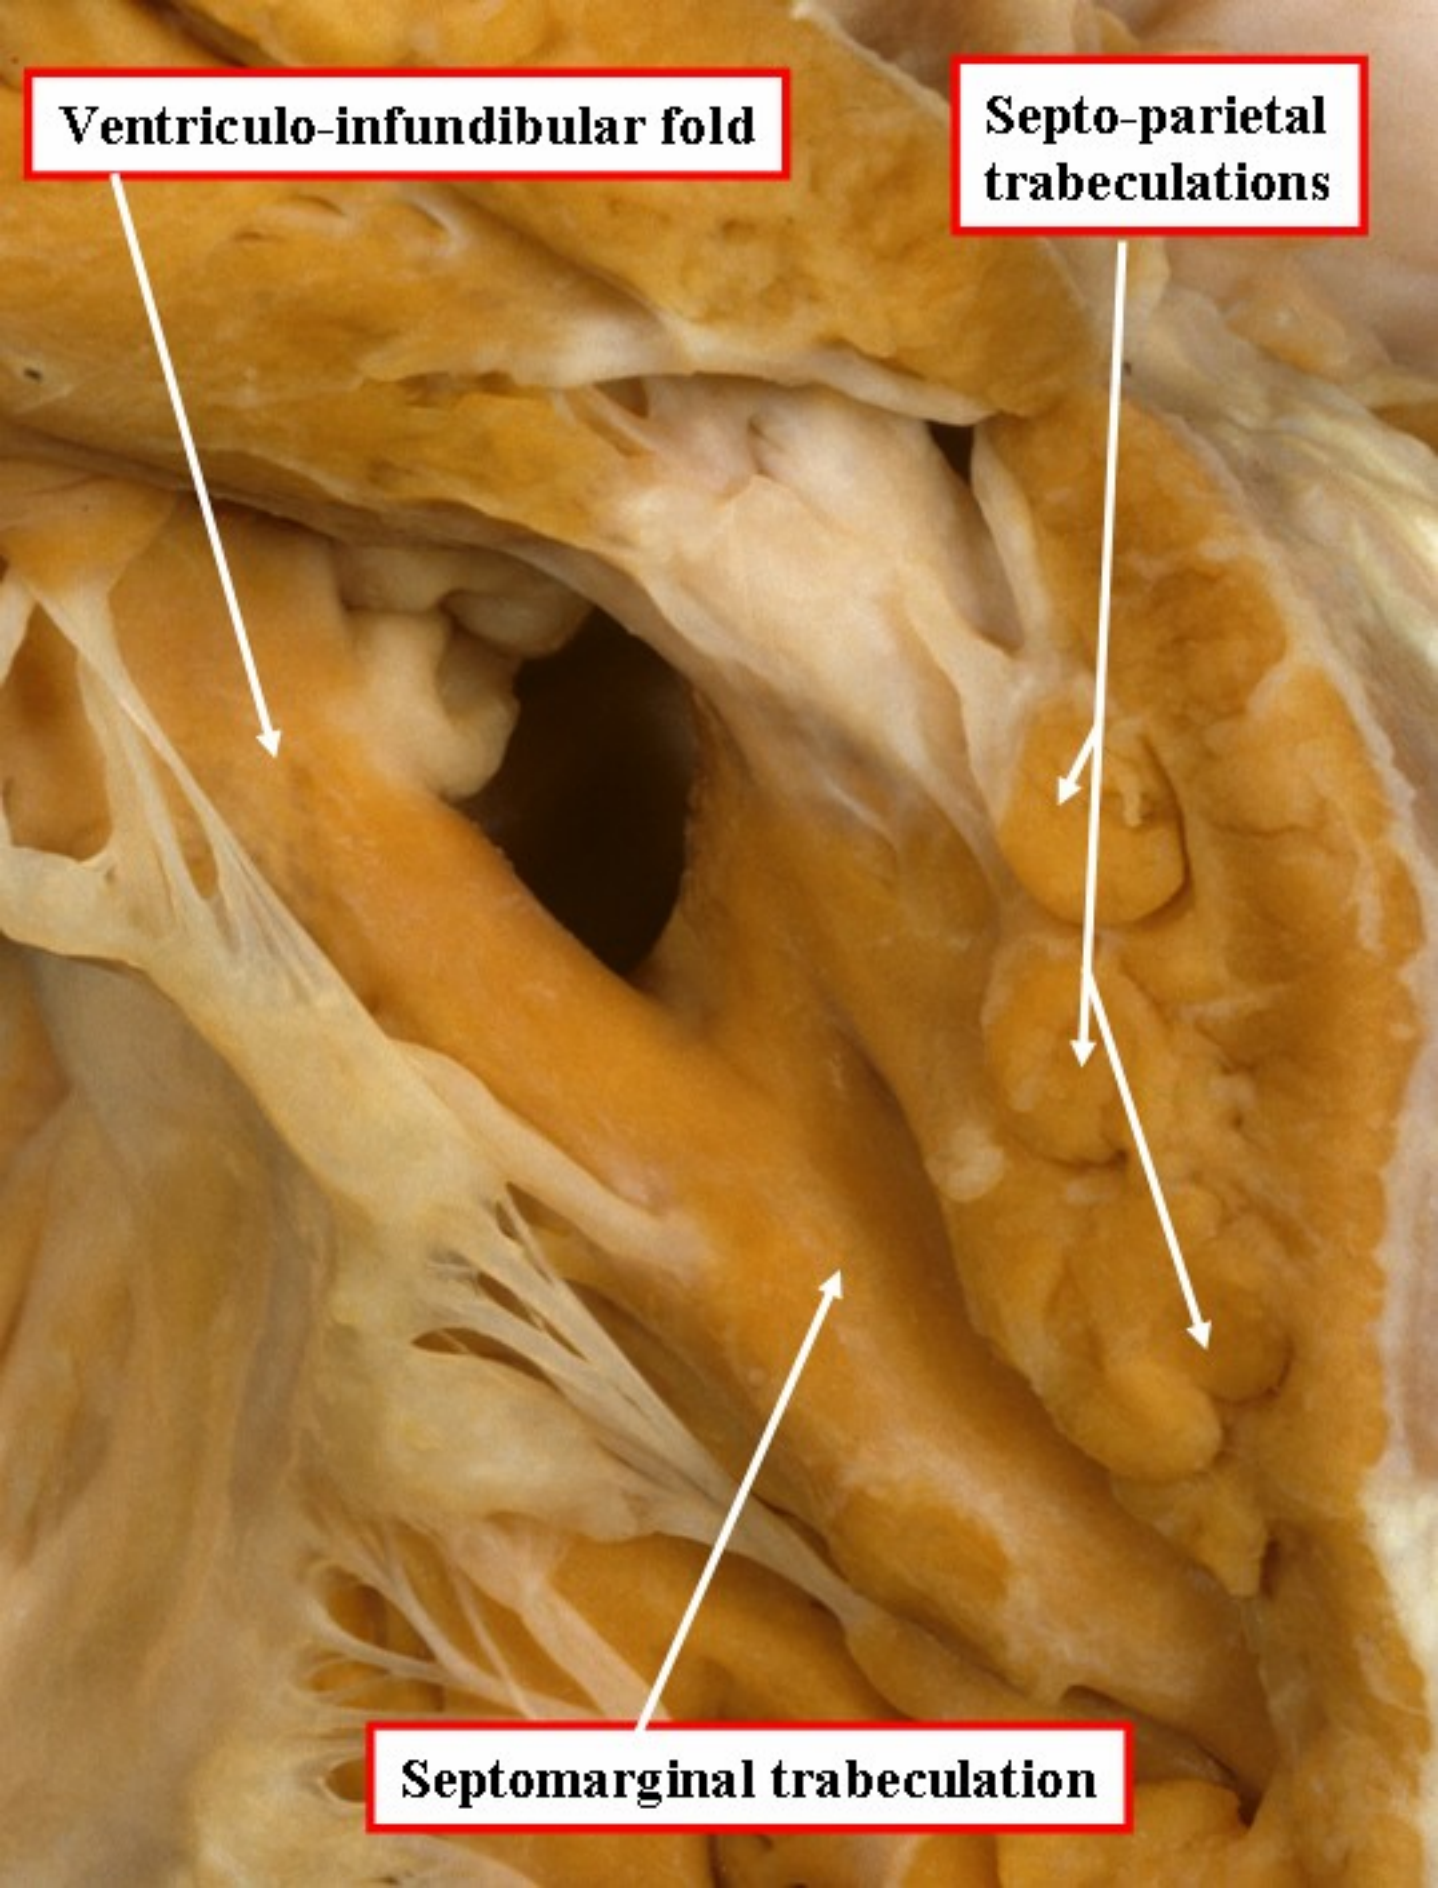

Supplement: MOESM3 [file 9641750]
